# Supplementary material for: Indwelling Peritoneal Catheter for Ascites Management in a UK District General Hospital: A Cohort Study
Source: MDPI journal article supplement (doi:10.3390/healthcare9101254), 2021-09-24
Supplement: s1 [file s1]

| Indwelling peritoneal catheter (IPC) for malignant ascites guidelines                                                                                                                                                                                                                       |                                                                                                                                             |
|---------------------------------------------------------------------------------------------------------------------------------------------------------------------------------------------------------------------------------------------------------------------------------------------|---------------------------------------------------------------------------------------------------------------------------------------------|
| <b>Document Type:</b> Clinical Guideline<br><b>Clinical Lead:</b> Avinash Aujayeb<br>Author/s: Sarah Robinson, Leonie Armstrong, Katie Frew<br><b>Business Unit/Directorate:</b> Acute and Emergency Medicine, Gastroenterology and General Surgery Approved by above consultants June 2018 | <b>Date Ratified by Clinical Guidelines Group:</b> 7 Aug 2018<br><b>Date of Issue:</b><br><b>Review Date:</b> May 2021<br><b>Version:</b> 1 |

**Relevant to:** Northumbria Healthcare NHS Foundation Trust, Community Teams (Specialist palliative care teams, district nursing teams, General Practitioners), Ward Teams – NSECH/NTGH/WGH/HGH

**Keywords** –malignant ascites, indwelling peritoneal catheter

### Criteria for use

This guideline is intended to guide clinicians for the referral and insertion of indwelling peritoneal catheters for malignant ascites

### Important Notes

There are 2 types of IPCs on the market : Rocket® and Pleurex. Due to cost benefits, Northumbria Healthcare NHS Foundation Trust use the former.

## **Guidelines**

### **1. Indications**

- a. Any patient with malignant ascites

*(Special consideration is required for patients with gynaecological cancers as they often have major surgery and an IPC might not be of benefit to them)*

- b. Ideally patients should have a WHO PS 0-3

*(Patients with a PS of 4 might be considered- please discuss with senior as an IPC reduces hospital admissions and can be a definitive procedure)*

- c. Send email to [avinash.aujayeb@nhct.nhs.uk](mailto:avinash.aujayeb@nhct.nhs.uk), [sarah.robinson@nhct.nhs.uk](mailto:sarah.robinson@nhct.nhs.uk), [leonie.armstrong@nhct.nhct.uk](mailto:leonie.armstrong@nhct.nhct.uk)

| Grade | Explanation of Activity                                                                                                                                   |
|-------|-----------------------------------------------------------------------------------------------------------------------------------------------------------|
| 0     | Fully active, able to carry on all pre-disease performance without restriction                                                                            |
| 1     | Restricted in physically strenuous activity but ambulatory and able to carry out work of a light or sedentary nature, e.g., light house work, office work |
| 2     | Ambulatory and capable of all self-care but unable to carry out any work activities. Up and about more than 50% of waking hours                           |
| 3     | Capable of only limited self-care, confined to bed or chair more than 50% of waking hours                                                                 |
| 4     | Completely disabled. Cannot carry on any self-care. Totally confined to bed or chair                                                                      |

### **2. Explanation to patient**

- a. The IPC is a silicone tube which goes through the skin and into the abdomen. It is semi-permanent and can be easily connected to bag to allow drainage of ascites without any further surgical procedure.

This prevents hospital admissions and is cost effective. It allows drainage of the ascites in the patient's own home.

The IPC is being offered as an alternative to repeated paracentesis.

# Symptomatic Malignant Ascites

Refer for USS if appropriate  
(i.e. if definitive intervention appropriate/possible)

Significant ascites on USS  
amenable to drainage

No

Inform referring person to get  
back in touch when ascites has  
increased

Yes

Previous ascitic drain?

No

Refer for paracentesis in  
Ambulatory care

Yes

Assess performance status  
(See above re gynae  
malignancies)

PS 4

Discuss with senior or specialist  
(contact details above) to  
consider if IPC still appropriate?  
If not: either;  
Make plans for repeated  
paracentesis in Ambulatory  
care  
Or  
Manage symptoms using  
alternative method (analgesia  
etc)

PS 1,2,3

Refer for IPC

Patient able to wait for IPC?

No

Insert ascitic drain for  
symptomatic relief whilst  
awaiting IPC

Yes

Refer for IPC

Antibiotics required for IPC  
insertion  
1 IV stat dose prior to procedure  
<65 Co-amoxiclav  
≥65 Tazocin

**In all cases consider if  
referral to palliative  
care required**

## References

- Therapeutic Procedures for Malignant Ascites in a Palliative Care Outpatient Clinic Sade Korpi, Veera V. Salminen, Reetta P. Piili, Niina Paunu, Tiina Luukkaala, and Juho T. Lehto Journal Of Palliative Medicine 2018
- NICE Guidance PleurX peritoneal catheter drainage for treatment-resistant, recurrent ascites MTG 9

## Further information/contacts

.....Avinash.Aujayeb@nhct.nhs.uk.....

**Add to Intranet – Please Indicate appropriate Specialties:**

**: Acute and Emergency Medicine, Gastroenterology and General Surgery**
